# Supplementary material
Source: PubMed Central journal article supplement (PMC1690963)
Supplement: 11958711s01.pdf [file 11958711s01.pdf]

This is an electronic appendix to the paper by Zollikofer & Ponce de León 2002  
 Visualizing patterns of craniofacial shape variation in *Homo sapiens*. *Proc. R. Soc. Lond. B* **269**, 801-807.

Electronic appendices are refereed with the text. However, no attempt has been made to impose a uniform editorial style on the electronic appendices.

**Appendix A.**  
**Table A1. Specimens.**

| specimen*          | postnatal dental<br>age (y) | sex | locality         |
|--------------------|-----------------------------|-----|------------------|
| AS 807             | 3                           | m   | Africa           |
| UHZ 4              | 3.5                         |     | India            |
| AS 174             | 4                           | f   | Africa           |
| AIZ Wt             | 5                           |     | Switzerland      |
| AIZ 127            | 5                           |     | India            |
| AIZ 1006BV43       | 6.5                         |     | New Guinea       |
| NHM 86.4.27.5      | 7                           |     | Greenland        |
| AIZ 1000BV37       | 7.5                         |     | N-America        |
| AS 29              | 8                           | f   | Africa           |
| AIZ 63BV3          | 13                          |     | Asia             |
| Qafzeh 11 (fossil) | 13.5                        |     | Israel           |
| AIZ Po             | 15                          | f   | Austria          |
| AIZ 4539           | adult                       | m   | Australia        |
| AIZ 5671           | adult                       | m   | Africa           |
| AIZ 8731           | adult                       |     | India            |
| NHM BD1191         | adult                       | f   | Greenland        |
| NHM AM10_8540      | adult                       | m   | Greenland        |
| NHM 1025.4         | adult                       |     | Tierra del Fuego |
| NHM 1915.5.5.1     | adult                       |     | Patagonia        |
| Qafzeh 9 (fossil)  | adult                       |     | Israel           |

\* AIZ: collection of the Anthropological Institute, Zurich  
 AS: A. Schultz collection, Zurich;  
 NHM: Natural History Museum, London  
 UHZ: collection of the University Hospital, Zurich  
 Qafzeh: Tel Aviv University, Tel Aviv

**Table A2. Landmark definitions.**

| <b>landmark</b>         | <b>definition*</b>                                                                                                     |
|-------------------------|------------------------------------------------------------------------------------------------------------------------|
| <b>cranium</b>          |                                                                                                                        |
| <i>midsagittal</i>      |                                                                                                                        |
| prosthion               | M                                                                                                                      |
| nasospinale             | M                                                                                                                      |
| nasion                  | M                                                                                                                      |
| glabella                | M                                                                                                                      |
| mid-nasion-bregma       | midpoint of the arch nasion-bregma                                                                                     |
| bregma                  | M                                                                                                                      |
| mid-bregma-lambda       | midpoint of the arch bregma-lambda                                                                                     |
| lambda                  | M                                                                                                                      |
| inion                   | M                                                                                                                      |
| opisthion               | M                                                                                                                      |
| basion                  | M                                                                                                                      |
| sphenobasion            | M                                                                                                                      |
| staphylion              | M                                                                                                                      |
| foramen caecum          | pit between crista frontalis and crista galli                                                                          |
| <i>bilateral</i>        |                                                                                                                        |
| 2nd (pre)molar          | buccalmost midpoint on crown of the second upper deciduous molar or of the second permanent premolar                   |
| foramen infraorbitale   | midpoint of the foramen on the level of the maxillary bone surface                                                     |
| zygomaxillare           | M                                                                                                                      |
| orbitale                | M                                                                                                                      |
| maxillofrontale         | M                                                                                                                      |
| foramen supraorbitale   | midpoint of the foramen/notch along the supraorbital rim;<br>if foramen not present: highest point of supraorbital rim |
| frontomalare orbitale   | M                                                                                                                      |
| jugale                  | point on the posterior rim of the zygomatic bone, connecting the orbital and zygomatic processes                       |
| eminentia frontalis     | point with highest Gaussian curvature on the squama of the frontal bone                                                |
| mid-coronale            | midpoint of the arch bregma-pterion                                                                                    |
| eminentia parietalis    | point with highest Gaussian curvature on the parietal bone                                                             |
| asterion                | M                                                                                                                      |
| entomion                | M                                                                                                                      |
| porion                  | M                                                                                                                      |
| mid-lambda              | midpoint of the arch lambda-asterion                                                                                   |
| foramen stylomastoideum | midpoint of the foramen on the level of the bone surface                                                               |
| foramen caroticum       | midpoint of the foramen on the level of the external bone surface                                                      |
| <b>mandible</b>         |                                                                                                                        |
| <i>midsagittal</i>      |                                                                                                                        |
| infradentale            | M                                                                                                                      |
| gnathion                | M                                                                                                                      |
| akanthion               | M                                                                                                                      |
| <i>bilateral</i>        |                                                                                                                        |
| 2nd (pre)molar          | buccalmost midpoint on crown of the second lower deciduous molar or of the second permanent premolar                   |
| foramen mentale         | midpoint on the bone surface level                                                                                     |
| foramen mandibulae      | midpoint on the bone surface level                                                                                     |
| gonion                  | M                                                                                                                      |
| processus coronoideus   | tip of the coronoid process                                                                                            |
| mesokondylion           | midpoint on the glenoid surface of the mandibular condyle                                                              |

\* M: according to Martin, R. (1914). *Lehrbuch der Anthropologie*. Jena: Gustav Fischer.
